# Supplementary material for: Trends in the Number of Behavioural Theory-Based Healthy Eating Interventions Inclusive of Dietitians/Nutritionists in 2000–2020
Source: MDPI journal article supplement (doi:10.3390/nu13114161), 2021-11-20
Supplement: s1 [file s1]

**Table S1.** Complete search strategy in Medline.

1. (THEOR\* adj2 (COGNITIVE or TRANSTHEORETICAL or TRANS THEORETICAL or PLANNED or CONTROL or SELF-DETERMINATION)).tw.
2. (MODEL\* adj2 (TRANSTHEORETICAL or TRANS THEORETICAL)).tw.
3. (Model\* adj2 Information Motivation Behavior\* Skill\*).tw.
4. SOCIAL COGNITIVE THEOR\*.tw.
5. SOCIAL LEARNING THEOR\*.tw.
6. Health Action Process Approach.tw.
7. (BEHAVIO\* adj2 (THEOR\* or TECHNIQUE\*)).tw.
8. health belief model\*.tw.
9. Diet, Healthy/
10. healthy people programs/
11. weight reduction programs/
12. healthy lifestyle/
13. ((NUTRITION\* or DIET\* or HEALTHY EATING) adj1 (KNOWLEDGE or GUIDELINE\* or INTERVENTION\* or EDUCATION or PROGRAM\* or INITIATIVE\* or STRATEG\* or CAMPAIGN\* or ADVICE\* or COACH\* or COUNSEL\*)).tw.
14. exp Beverages/
15. Bread/
16. exp Candy/
17. Chocolate/
18. Fruit/
19. Vegetables/
20. Meat/
21. Nuts/
22. Salads/
23. exp Seeds/
24. exp Dairy Products/
25. exp dietary carbohydrates/
26. exp dietary fats/
27. exp dietary fiber/
28. exp dietary proteins/
29. exp Eggs/
30. Fast foods/
31. (FOOD\* adj1 (TAKEAWAY or CONVENIEN\* or FAST or DISCRETIONARY)).tw.
32. (FOOD\* adj1 (ENERGY-DENSE or NUTRIENT-POOR or ULTRA-PROCESSED or PROCESSED)).tw.
33. FRUIT\*.tw.
34. VEGETABLE\*.tw.
35. GRAIN\*.tw.
36. (BREAD or CEREAL\*).tw.
37. MEAT\*.tw.
38. (NUT\* or SEED\*).tw.
39. DAIRY.tw.
40. MILK.tw.
41. EGG\*.tw.
42. FOOD GROUP\*.tw.
43. ((SUGAR\* or SWEET\* or ENERGY) adj2 (BEVERAGE\* or DRINK\*)).tw.
44. (DIETARY adj1 (CARBOHYDRATE\* or FAT\* or FIBRE\* or PROTEIN\*)).tw.
45. Portion Size/
46. Serving Size/
47. Food Preferences/
48. (EATING adj2 (BEHAVIO\* or HABIT\* or PRACTICE\*)).tw.
49. (SIZE\* adj1 (PORTION or SERV\*)).tw.
50. (PREPAR\* adj2 (FOOD\* or MEAL\*)).tw.
51. (OVEREAT\* or OVER-EAT\*).tw.
52. or/1-8
53. or/9-51
54. 52 and 53
55. limit 54 to (english language and yr="2000 -Current")
56. limit 55 to humans

**Table S2.** Summary of Studies.

| Author (Ref number)         | Year | Dietitian/Nutritionist | Country   | Dietary behaviour                          | Theory                                                                             | BCTs taxonomy |
|-----------------------------|------|------------------------|-----------|--------------------------------------------|------------------------------------------------------------------------------------|---------------|
| Okayama et al [11]          | 2019 | No                     | Japan     | Vitamin D food sources                     | Transtheoretical model                                                             | No            |
| Gregorio-Pascual et al [12] | 2019 | No                     | USA       | Sugar-sweetened beverages                  | Theory of planned behaviour                                                        | No            |
| Ainscough et al [13]        | 2019 | Yes                    | Ireland   | Healthy eating                             | Control theory<br>Social cognitive theory<br>COM-B model                           | Yes           |
| Wright et al [14]           | 2019 | Yes                    | USA       | Fruits and/or vegetables                   | Health belief model                                                                | No            |
| White et al [15]            | 2019 | Yes                    | USA       | Cooking skills & Healthy eating            | Social cognitive theory                                                            | No            |
| Smith et al [16]            | 2019 | Yes                    | USA       | Dairy products                             | Social cognitive theory                                                            | No            |
| Shirazi et al [17]          | 2019 | No                     | Iran      | Healthy eating                             | Social cognitive theory                                                            | No            |
| Rahimdel et al [18]         | 2019 | Yes                    | Iran      | Salt intake                                | Theory of planned behaviour                                                        | No            |
| Pope et al [19]             | 2019 | No                     | USA       | Fruits and/or vegetables<br>Calorie intake | Social cognitive theory<br>Self-determination theory                               | No            |
| Poole et al [20]            | 2019 | Yes                    | USA       | Healthy eating                             | Social cognitive theory                                                            | No            |
| Parandeh et al [21]         | 2019 | No                     | Iran      | Calcium intake                             | Health belief model                                                                | No            |
| Ovrebo et al [22]           | 2019 | Yes                    | Norway    | Fruits and/or vegetables                   | Social cognitive theory                                                            | No            |
| Muzaffar et al [23]         | 2019 | Yes                    | USA       | Healthy eating                             | Social cognitive theory<br>Stage of change model ie from<br>Transtheoretical model | No            |
| Meurer et al [24]           | 2019 | Yes                    | Brazil    | Healthy eating                             | Social cognitive theory                                                            | No            |
| Leme et al [25]             | 2019 | Yes                    | Brazil    | Healthy eating                             | Social cognitive theory                                                            | No            |
| Kulik et al [26]            | 2019 | No                     | USA       | Healthy eating                             | Social cognitive theory                                                            | No            |
| Koch et al [27]             | 2019 | Yes                    | USA       | Healthy eating                             | Social cognitive theory<br>Self-determination theory                               | No            |
| Keshani et al [28]          | 2019 | Yes                    | Iran      | Healthy eating                             | Health belief model                                                                | No            |
| Jung et al [29]             | 2019 | No                     | USA       | Healthy eating                             | Social cognitive theory                                                            | No            |
| Heikkila et al [30]         | 2019 | Yes                    | Finland   | Healthy eating                             | Self-Determination Theory                                                          | No            |
| Hammersley et al [31]       | 2019 | Yes                    | Australia | Healthy eating                             | Social cognitive theory                                                            | No            |
| Ghaffari et al [32]         | 2019 | No                     | Iran      | Fruits and/or vegetables                   | Social cognitive theory                                                            | No            |
| Augustin et al [33]         | 2019 | Yes                    | USA       | Healthy eating                             | Theory of planned behaviour<br>Social ecological theory                            | No            |
| Alami et al [34]            | 2019 | No                     | Iran      | Iron and Vitamin D supplements             | Theory of planned behaviour                                                        | No            |
| Worawong et al [35]         | 2018 | No                     | USA       | Fruits and/or vegetables &<br><10% fat     | Self-regulation theory<br>Self-determination theory                                | No            |

| van Doorn-van Atten et al [36] | 2018 | Yes                    | Netherlands   | Healthy eating                                       | Control theory                                                                | Yes           |
|--------------------------------|------|------------------------|---------------|------------------------------------------------------|-------------------------------------------------------------------------------|---------------|
| Park et al [37]                | 2018 | Yes                    | USA           | Healthy eating                                       | Social cognitive theory                                                       | No            |
| Overby et al [38]              | 2018 | Yes                    | USA           | Healthy eating                                       | Health belief model                                                           | No            |
| Myers et al [39]               | 2018 | Yes                    | USA           | Healthy eating                                       | Social cognitive theory                                                       | No            |
| Lion et al [40]                | 2018 | No                     | Nigeria       | Green leafy vegetables and bouillon cubes            | Theory of planned behaviour                                                   | Yes           |
| Author (Ref number)            | Year | Dietitian/Nutritionist | Country       | Dietary behaviour                                    | Theory                                                                        | BCTs taxonomy |
| Lane et al [41]                | 2018 | Yes                    | USA           | Sugar-sweetened beverages                            | Theory of planned behaviour                                                   | No            |
| Lakshman et al [42]            | 2018 | No                     | UK            | Dairy products                                       | Social cognitive theory                                                       | Yes           |
| Knowlden et al [43] [84][103]  | 2018 | No                     | USA           | Fruits and/or vegetables & Sugar-sweetened beverages | Social cognitive theory                                                       | No            |
| Hatami et al [44]              | 2018 | Yes                    | Iran          | Healthy eating                                       | Health belief model                                                           | No            |
| Ellis et al [45]               | 2018 | Yes                    | USA           | Healthy eating                                       | Social cognitive theory                                                       | No            |
| Amirzadeh Iranagh et al [46]   | 2018 | No                     | Iran          | Healthy eating                                       | Health belief model                                                           | No            |
| Ahmadi et al [47]              | 2018 | No                     | Iran          | Discretionary foods (fast food)                      | Social cognitive theory                                                       | No            |
| Wentzel-Viljoen et al [48]     | 2017 | Yes                    | South African | Salt intake                                          | Theory of reasoned action                                                     | No            |
| Sharma et al [49]              | 2017 | Yes                    | USA           | Fruits and/or vegetables                             | Theory of planned behaviour<br>Social cognitive theory                        | No            |
| Rosario et al [50]             | 2017 | No                     | Portugal      | Healthy eating                                       | Health promotion model<br>Social cognitive theory                             | No            |
| Nerud et al [51]               | 2017 | No                     | USA           | Healthy eating                                       | Social cognitive theory                                                       | No            |
| Nakamura et al [52]            | 2017 | No                     | Japan         | Fruits and/or vegetables                             | Social cognitive theory<br>Theory of planned behaviour<br>Health belief model | No            |
| Lin et al [53]                 | 2017 | No                     | Iran          | Fruits and/or vegetables                             | Health action process approach                                                | Yes           |
| Laramée et al [54]             | 2017 | Yes                    | Canada        | Decreasing restrictive dietary behaviors             | Theory of planned behaviour                                                   | No            |
| Kehm et al [55]                | 2017 | No                     | USA           | Fruits and/or vegetables<br>Healthy eating           | Health belief model                                                           | No            |
| Kalkim et al [56]              | 2017 | No                     | Turkey        | Calcium intake                                       | Health belief model                                                           | No            |
| Heeren et al [57]              | 2017 | No                     | South African | Fruits and/or vegetables<br>Fat intake               | Social cognitive theory<br>Theory of planned behaviour                        | No            |
| Duan et al [58]                | 2017 | No                     | China         | Fruits and/or vegetables                             | Health action process approach                                                | Yes           |

|                            |             |                               |                               |                                                 |                                                             |                      |
|----------------------------|-------------|-------------------------------|-------------------------------|-------------------------------------------------|-------------------------------------------------------------|----------------------|
| Dinkel et al [59]          | 2017        | No                            | USA                           | Healthy eating                                  | Transtheoretical model<br>Social cognitive theory           | No                   |
| de Bruijn et al [60]       | 2017        | No                            | Netherlands                   | Fruits and/or vegetables<br>Discretionary foods | Theory of planned behaviour                                 | No                   |
| Carfora et al [61]         | 2017        | No                            | Italy                         | Healthy eating (decreasing<br>processed meat)   | Theory of planned behaviour                                 | Yes                  |
| Burgermaster et al [62]    | 2017        | Yes                           | USA                           | Healthy eating                                  | Social cognitive theory<br>Self-determination theory        | No                   |
| Brookie et al [63]         | 2017        | Yes                           | New<br>Zealand                | Fruits and/or vegetables                        | Health action process<br>approach                           | Yes                  |
| Bird et al [64]            | 2017        | Yes                           | USA                           | Healthy eating on a budget                      | Theory of planned behaviour                                 | No                   |
| Araban et al [65]          | 2017        | No                            | Iran                          | Calorie, iron, folic acid intake                | Health belief model                                         | No                   |
| <b>Author (Ref number)</b> | <b>Year</b> | <b>Dietitian/Nutritionist</b> | <b>Country</b>                | <b>Dietary behaviour</b>                        | <b>Theory</b>                                               | <b>BCTs taxonomy</b> |
| Zoellner et al [66]        | 2016        | Yes                           | USA                           | Sugar-sweetened beverages                       | Theory of planned behaviour                                 | No                   |
| Yoong et al [67]           | 2016        | Yes                           | Australia                     | Healthy eating                                  | Theory of planned behaviour                                 | No                   |
| Tavakoli et al [68]        | 2016        | No                            | Iran                          | Healthy eating                                  | Health belief model                                         | No                   |
| Taghdisi et al [69]        | 2016        | No                            | Iran                          | Fruits and/or vegetables                        | Theory of planned behaviour                                 | No                   |
| Storm et al [70]           | 2016        | No                            | Germany<br>and<br>Netherlands | Fruits and/or vegetables                        | Health action process<br>approach                           | No                   |
| Shobeiri et al [71]        | 2016        | No                            | Iran                          | Calcium intake                                  | Health belief model                                         | No                   |
| Schultz et al [72]         | 2016        | Yes                           | USA                           | Healthy eating                                  | Social ecological model                                     | No                   |
| Roberts-Gray et al [73]    | 2016        | Yes                           | USA                           | Healthy eating                                  | Social cognitive theory<br>Theory of reasoned action        | Yes                  |
| Plaete et al [74]          | 2016        | No                            | Belgium                       | Fruits and/or vegetables                        | Self-regulation theory<br>Health action process<br>approach | Yes                  |
| Mulualem et al [75]        | 2016        | Yes                           | Ethiopia                      | Child feeding                                   | Health belief model                                         | No                   |
| Mirzaei et al [76]         | 2016        | No                            | Iran                          | Reducing hot tea consumption                    | Theory of planned behaviour                                 | No                   |
| Miller et al [77]          | 2016        | Yes                           | USA                           | Healthy eating/cooking                          | Social cognitive theory                                     | No                   |
| Mauriello et al [78]       | 2016        | No                            | USA                           | Fruits and/or vegetables                        | Transtheoretical model                                      | No                   |
| Lin et al [79]             | 2016        | No                            | China                         | Discretionary foods                             | Social cognitive theory                                     | No                   |
| Lein et al [80]            | 2016        | Yes                           | USA                           | Calcium intake<br>Vitamin D food sources        | Health belief model                                         | No                   |
| Lawlor et al [81]          | 2016        | No                            | UK                            | Healthy eating                                  | Social cognitive theory                                     | No                   |

|                            |             |                               |                |                                            |                                                                                |                      |
|----------------------------|-------------|-------------------------------|----------------|--------------------------------------------|--------------------------------------------------------------------------------|----------------------|
| Kocken et al [82]          | 2016        | Yes                           | Netherlands    | Healthy eating                             | Theory of planned behaviour                                                    | No                   |
| Ko et al [83]              | 2016        | No                            | USA            | Fruits and/or vegetables<br>Healthy eating | Social cognitive theory                                                        | No                   |
| Knol et al [85]            | 2016        | Yes                           | USA            | Healthy eating                             | Social cognitive theory                                                        | No                   |
| Iranagh et al [86]         | 2016        | No                            | Iran           | Healthy eating                             | Health belief model                                                            | No                   |
| Goodman et al [87]         | 2016        | Yes                           | Canada         | Vitamin D food sources                     | Theory of planned behaviour                                                    | No                   |
| Girelli et al [88]         | 2016        | No                            | Italy          | Healthy eating                             | Self-determination theory                                                      | No                   |
| Appleton [89]              | 2016        | No                            | UK             | Fruits and/or vegetables                   | Theory of planned behaviour                                                    | No                   |
| Alidosti et al [90]        | 2016        | No                            | Iran           | Healthy eating                             | Health belief model                                                            | No                   |
| Ahn et al [91]             | 2016        | No                            | USA            | Fruits and/or vegetables                   | Social cognitive theory                                                        | No                   |
| Triador et al [92]         | 2015        | Yes                           | Canada         | Fruits and/or vegetables                   | Social cognitive theory                                                        | No                   |
| Tavassoli et al [93]       | 2015        | No                            | Iran           | Fruits and/or vegetables                   | Health belief model                                                            | No                   |
| Tariku et al [94]          | 2015        | Yes                           | Ethiopia       | Infant feeding practices                   | Health belief model                                                            | No                   |
| Shin et al [95]            | 2015        | Yes                           | USA            | Healthy eating                             | Social cognitive theory                                                        | No                   |
| Savoie et al [96]          | 2015        | Yes                           | USA            | Healthy eating                             | Theory of planned behaviour                                                    | No                   |
| Pooreh et al [97]          | 2015        | No                            | Iran           | Healthy eating                             | Theory of planned behaviour                                                    | No                   |
| Monroe et al [98]          | 2015        | Yes                           | USA            | Green eating behaviours                    | Transtheoretical model                                                         | No                   |
| Menezes et al [99]         | 2015        | Yes                           | Brazil         | Healthy eating                             | Transtheoretical model                                                         | No                   |
| <b>Author (Ref number)</b> | <b>Year</b> | <b>Dietitian/Nutritionist</b> | <b>Country</b> | <b>Dietary behaviour</b>                   | <b>Theory</b>                                                                  | <b>BCTs taxonomy</b> |
| Marchetti et al [100]      | 2015        | No                            | Italy          | Healthy eating                             | Transtheoretical model<br>Social cognitive theory<br>Self-determination theory | No                   |
| Leblanc et al [101] [102]  | 2015        | Yes                           | Canada         | Mediterranean Diet                         | Self-determination theory                                                      | No                   |
| Khoramabadi et al [104]    | 2015        | No                            | Iran           | Healthy eating                             | Health belief model                                                            | No                   |
| Jing et al [105]           | 2015        | No                            | China          | Healthy eating                             | Health belief model                                                            | No                   |
| Jeihooni et al [106]       | 2015        | No                            | Iran           | Calcium intake<br>Vitamin D food sources   | Health belief model                                                            | No                   |
| Gray et al [107]           | 2015        | Yes                           | USA            | Healthy eating                             | Social cognitive theory<br>Self-determination theory                           | No                   |
| Godinho et al [108]        | 2015        | No                            | Portugal       | Fruits and/or vegetables                   | Health action process<br>approach                                              | Yes                  |
| Frerichs et al [109]       | 2015        | No                            | USA            | Healthy eating                             | Social cognitive theory                                                        | No                   |
| Flattum et al [110]        | 2015        | Yes                           | USA            | Healthy eating                             | Social cognitive theory                                                        | No                   |
| Duncan et al [111]         | 2015        | No                            | UK             | Fruits and/or vegetables                   | Theory of planned behaviour<br>and Social cognitive theory                     | Yes                  |

|                            |             |                               |                     |                                                   |                                                      |                      |
|----------------------------|-------------|-------------------------------|---------------------|---------------------------------------------------|------------------------------------------------------|----------------------|
| Cook et al [112]           | 2015        | No                            | USA                 | Healthy eating                                    | Social cognitive theory                              | No                   |
| Cameron et al [113]        | 2015        | No                            | UK                  | Fruits and/or vegetables<br>Alcohol               | Theory of planned behaviour                          | Yes                  |
| Burrows et al [114]        | 2015        | Yes                           | Australia           | Healthy eating<br>Cooking skills                  | Social cognitive theory                              | No                   |
| Brown et al [115]          | 2015        | No                            | USA                 | Fruits and/or vegetables<br>Salt intake           | Self-determination theory                            | No                   |
| Taylor et al [116]         | 2014        | Yes                           | USA                 | Healthy eating                                    | Transtheoretical model                               | No                   |
| Tavassoli et al [117]      | 2014        | No                            | Iran                | Fruits and/or vegetables                          | Health belief model                                  | No                   |
| Smith et al [118]          | 2014        | No                            | Australia           | Sugar-sweetened beverages                         | Social cognitive theory<br>Self-determination theory | Yes                  |
| Sigman-Grant et al [119]   | 2014        | Yes                           | USA                 | Healthy eating                                    | Social learning theory                               | No                   |
| Seth et al [120]           | 2014        | No                            | USA                 | Healthy eating                                    | Social cognitive theory                              | No                   |
| Peters et al [121]         | 2014        | Yes                           | USA                 | Healthy eating                                    | Social cognitive theory                              | Yes                  |
| Naghashpour et al [122]    | 2014        | Yes                           | Iran                | Calcium intake                                    | Health belief model                                  | No                   |
| Muzaffar et al [123]       | 2014        | Yes                           | USA                 | Healthy eating                                    | Social cognitive theory                              | No                   |
| Leines et al [124]         | 2014        | Yes                           | USA                 | Fruits and/or vegetables                          | Social cognitive theory                              | No                   |
| Lein et al [125]           | 2014        | Yes                           | UK                  | Calcium intake<br>Vitamin D food sources          | Health belief model                                  | No                   |
| Leblanc et al [126]        | 2014        | Yes                           | Canada              | Mediterranean Diet                                | Self-determination theory                            | No                   |
| Lana et al [127]           | 2014        | No                            | Spain and<br>Mexico | Healthy eating &<br>Alcohol                       | Transtheoretical model                               | No                   |
| Kushida et al [128]        | 2014        | Yes                           | Japan               | Fruits and/or vegetables                          | Transtheoretical model                               | No                   |
| Kothe et al [129]          | 2014        | No                            | Australia           | Fruits and/or vegetables                          | Theory of planned behaviour                          | Yes                  |
| <b>Author (Ref number)</b> | <b>Year</b> | <b>Dietitian/Nutritionist</b> | <b>Country</b>      | <b>Dietary behaviour</b>                          | <b>Theory</b>                                        | <b>BCTs taxonomy</b> |
| Kothe et al [130]          | 2014        | No                            | Australia           | Fruits and/or vegetables                          | Theory of planned behaviour                          | Yes                  |
| Kobel et al [131]          | 2014        | No                            | Germany             | Sugar-sweetened beverages &<br>breakfast skipping | Social cognitive theory                              | No                   |
| Keita et al [132]          | 2014        | Yes                           | USA                 | Healthy eating                                    | Social cognitive theory                              | No                   |
| Jancey et al [133]         | 2014        | Yes                           | Australia           | Healthy Eating                                    | Social cognitive theory<br>Transtheoretical model    | No                   |
| Harmon et al [134]         | 2014        | No                            | USA                 | Fruits and/or vegetables<br>Fat intake (decrease) | Social cognitive theory                              | No                   |
| Habib-Mourad et al [135]   | 2014        | Yes                           | Lebanon             | Healthy eating                                    | Social cognitive theory                              | No                   |
| Gold et al [136]           | 2014        | Yes                           | USA                 | Food safety knowledge                             | Theory of planned behaviour                          | No                   |

| Epton et al [137]               | 2014 | No                     | UK        | Fruit and/or vegetables & Alcohol        | Theory of planned behaviour                                                         | No            |
|---------------------------------|------|------------------------|-----------|------------------------------------------|-------------------------------------------------------------------------------------|---------------|
| Bai et al [138]                 | 2014 | Yes                    | USA       | Fruits and/or vegetables                 | Theory of planned behaviour                                                         | No            |
| Annesi et al [139]              | 2014 | No                     | USA       | Healthy eating                           | Social cognitive theory                                                             | No            |
| Yao et al [140]                 | 2013 | Yes                    | USA       | Whole grain foods                        | Social cognitive theory                                                             | No            |
| Velicer t al [141]              | 2013 | No                     | USA       | Healthy eating                           | Transtheoretical model                                                              | No            |
| Smith et al [142]               | 2013 | No                     | USA       | Healthy eating                           | Theory of planned behaviour<br>Social cognitive theory<br>Self-determination theory | No            |
| Ryan et al [143]                | 2013 | No                     | USA       | Calcium intake<br>Vitamin D food sources | Integrated theory of health behavior Change.                                        | No            |
| Rosario et al [144]             | 2013 | Yes                    | Portugal  | Discretionary foods                      | Health promotion model<br>Social cognitive theory                                   | No            |
| Rani et al [145]                | 2013 | yes                    | India     | Healthy eating                           | Health belief model                                                                 | No            |
| Puma et al [146]                | 2013 | Yes                    | USA       | Healthy eating                           | Social cognitive theory                                                             | No            |
| Najimi et al [147]              | 2013 | No                     | Iran      | Fruits and/or vegetables                 | Social cognitive theory                                                             | No            |
| Nabi et al [148]                | 2013 | No                     | USA       | Healthy eating                           | Social cognitive theory                                                             | No            |
| Mead et al [149]                | 2013 | Yes                    | Canada    | Healthy eating                           | Social cognitive theory<br>Social ecological model                                  | No            |
| Mayurachat et al [150]          | 2013 | No                     | Thailand  | Healthy eating                           | Theory of planned behaviour                                                         | No            |
| Majumdar et al [151]            | 2013 | Yes                    | USA       | Healthy eating                           | Social cognitive theory<br>Self-determination theory                                | No            |
| Locher et al [152]              | 2013 | Yes                    | USA       | Healthy eating                           | Social cognitive theory<br>Social ecological model                                  | No            |
| Linnell et al [153]             | 2013 | Yes                    | USA       | Calcium intake                           | Social cognitive theory                                                             | No            |
| LaBrosse et al [154]            | 2013 | Yes                    | USA       | Folate-rich foods                        | Health belief model                                                                 | No            |
| Kerr et al [155]                | 2013 | No                     | USA       | Healthy eating                           | Social cognitive theory                                                             | No            |
| Karimi-Shahanjarini et al [156] | 2013 | Yes                    | Iran      | Discretionary foods (snacks)             | Theory of planned behaviour                                                         | No            |
| Hecht et al [157]               | 2013 | Yes                    | USA       | Healthy eating                           | Theory of planned behaviour                                                         | No            |
| Author (Ref number)             | Year | Dietitian/Nutritionist | Country   | Dietary behaviour                        | Theory                                                                              | BCTs taxonomy |
| Gutschall et al [158]           | 2013 | Yes                    | USA       | Healthy eating                           | Social cognitive theory                                                             | No            |
| Gates et al [159]               | 2013 | Yes                    | Canada    | Dairy products                           | Social cognitive theory                                                             | No            |
| Dixon et al [160]               | 2013 | Yes                    | USA       | Healthy eating/Cooking skills            | Social cognitive theory                                                             | No            |
| Dirige et al [161]              | 2013 | Yes                    | USA       | Fruits and/or vegetables<br>Fat intake   | Transtheoretical model                                                              | No            |
| Dewar et al [162]               | 2013 | Yes                    | Australia | Healthy eating                           | Social cognitive theory                                                             | No            |

|                           |      |     |                  |                                      |                                                                                     |     |
|---------------------------|------|-----|------------------|--------------------------------------|-------------------------------------------------------------------------------------|-----|
| Burrows et al [163]       | 2013 | Yes | Australia        | Healthy eating and<br>Cooking skills | Social cognitive theory                                                             | No  |
| Branscum et al [164]      | 2013 | Yes | USA              | Healthy eating                       | Social cognitive theory                                                             | Yes |
| Bhurosy et al [165]       | 2013 | No  | Mauritius        | Calcium intake                       | Health belief model                                                                 | No  |
| Alexopoulos et al [166]   | 2013 | No  | Greece           | Lipid intake                         | Health belief model                                                                 | No  |
| Aboud et al [167]         | 2013 | No  | Bangladesh       | Healthy eating                       | Social learning theory                                                              | No  |
| Wenrich et al [168]       | 2012 | Yes | USA              | Fruits and/or vegetables             | Social cognitive theory                                                             | No  |
| Somerville et al [169]    | 2012 | Yes | USA              | Fruits and/or vegetables             | Social cognitive theory                                                             | No  |
| Poddar et al [170]        | 2012 | Yes | USA              | Dairy products                       | Social cognitive theory                                                             | No  |
| Lubans et al [171]        | 2012 | Yes | Australia        | Healthy eating                       | Social cognitive theory                                                             | No  |
| Lent et al [172]          | 2012 | Yes | USA              | Healthy eating                       | Social cognitive theory                                                             | No  |
| Kothe et al [173]         | 2012 | No  | Australia        | Fruits and/or vegetables             | Theory of planned behaviour                                                         | Yes |
| Horodynski et al [174]    | 2012 | Yes | USA              | Healthy eating                       | Social cognitive theory                                                             | No  |
| Breslin et al [175] [176] | 2012 | Yes | UK               | Healthy eating                       | Social cognitive theory                                                             | No  |
| Beaulieu et al [177]      | 2012 | No  | Canada           | Discretionary foods (takeaway)       | Theory of planned behaviour                                                         | No  |
| Winett et al [178]        | 2011 | No  | USA              | Healthy eating                       | Social cognitive theory                                                             | No  |
| Smith et al [179]         | 2011 | No  | USA              | Healthy eating                       | Social cognitive theory<br>Self-determination theory<br>Theory of planned behaviour | No  |
| Sharma et al [180]        | 2011 | Yes | USA              | Healthy eating                       | Social cognitive theory                                                             | No  |
| Seal et al [181]          | 2011 | No  | USA              | Healthy eating                       | Social cognitive theory                                                             | No  |
| Salehi et al [182]        | 2011 | No  | Iran             | Fruits and/or vegetables             | Transtheoretical model                                                              | No  |
| Prelip et al [183]        | 2011 | No  | USA              | Fruits and/or vegetables             | Social cognitive theory<br>Theory of planned behaviour                              | No  |
| Lv et al [184]            | 2011 | Yes | USA              | Calcium intake and vitamin D         | Theory of planned behaviour                                                         | No  |
| Kothe et al [185]         | 2011 | No  | Australia        | Breakfast consumption                | Theory of planned behaviour                                                         | No  |
| Jung et al [186]          | 2011 | No  | Canada           | Calcium intake                       | Health belief model                                                                 | No  |
| Jones et al [187]         | 2011 | Yes | USA              | Healthy eating                       | Social cognitive theory                                                             | No  |
| Jemmott et al [188]       | 2011 | No  | South<br>African | Healthy eating                       | Social cognitive theory<br>Theory of planned behaviour                              | No  |
| Hendrie et al [189]       | 2011 | Yes | Australia        | Dairy products                       | Social learning theory                                                              | No  |
| Chen et al [190]          | 2011 | No  | USA              | Healthy eating                       | Transtheoretical model<br>Social cognitive theory                                   | No  |

| Author (Ref number) | Year | Dietitian/Nutritionist | Country | Dietary behaviour | Theory                                             | BCTs taxonomy |
|---------------------|------|------------------------|---------|-------------------|----------------------------------------------------|---------------|
| Bukhari et al [191] | 2011 | Yes                    | USA     | Healthy eating    | Social cognitive theory<br>Social ecological model | No            |



|                          |      |     |             |                                                        |                                                                             |    |
|--------------------------|------|-----|-------------|--------------------------------------------------------|-----------------------------------------------------------------------------|----|
| Abi Haidar et al [192]   | 2011 | Yes | Lebanon     | Water consumption                                      | Health belief model                                                         | No |
| Zhou et al [193]         | 2010 | No  | China       | Healthy eating                                         | Transtheoretical model                                                      | No |
| Zeinstra et al [194]     | 2010 | Yes | Netherlands | Fruits and/or vegetables                               | Self-determination theory                                                   | No |
| Walker et al [195]       | 2010 | Yes | USA         | Healthy eating                                         | Health promotion model                                                      | No |
| Poddar et al [196]       | 2010 | Yes | USA         | Dairy products                                         | Social cognitive theory                                                     | No |
| Pearson et al [197]      | 2010 | No  | UK          | Fruits and/or vegetables                               | Social cognitive theory                                                     | No |
| Milan et al [198]        | 2010 | Yes | USA         | Folate supplements                                     | Transtheoretical model                                                      | No |
| Irwin et al [199]        | 2010 | No  | USA         | Healthy eating                                         | Social cognitive theory                                                     | No |
| Freedman et al [200]     | 2010 | Yes | USA         | Healthy eating                                         | Social cognitive theory                                                     | No |
| Freedman et al [201]     | 2010 | Yes | USA         | Healthy eating                                         | Social cognitive theory                                                     | No |
| Contento et al [202]     | 2010 | Yes | USA         | Healthy eating                                         | Social cognitive theory<br>Self-determination theory                        | No |
| Brown et al [203]        | 2010 | Yes | USA         | Healthy eating                                         | Social cognitive theory                                                     | No |
| Black et al [204]        | 2010 | Yes | USA         | Healthy eating                                         | Social cognitive theory                                                     | No |
| Topp et al [205]         | 2009 | No  | USA         | Healthy eating                                         | Transtheoretical model                                                      | No |
| Shilts et al [206]       | 2009 | Yes | USA         | Healthy eating                                         | Social cognitive theory                                                     | No |
| Rosenkranz et al [207]   | 2009 | Yes | USA         | Healthy eating                                         | Social cognitive theory                                                     | No |
| Peng et al [208]         | 2009 | No  | USA         | Healthy eating                                         | Health belief model<br>Social cognitive theory<br>Theory of reasoned action | No |
| Lubans et al [209]       | 2009 | Yes | Australia   | Healthy eating                                         | Social cognitive theory                                                     | No |
| Koning et al [210]       | 2009 | No  | Netherlands | Alcohol consumption                                    | Theory of planned behaviour<br>Social cognitive theory                      | No |
| Gans et al [211]         | 2009 | No  | USA         | Fruits and/or vegetables<br>Fat intake                 | Transtheoretical model<br>Social cognitive theory                           | No |
| Elder et al [212]        | 2009 | No  | USA         | Fibre intake<br>Fat intake<br>Fruits and/or vegetables | Social cognitive theory                                                     | No |
| Clifford et al [213]     | 2009 | Yes | USA         | Fruits and/or vegetables                               | Social cognitive theory                                                     | No |
| Clark et al [214]        | 2009 | Yes | USA         | Infant feeding practices                               | Social learning theory                                                      | No |
| Branscum et al [215]     | 2009 | Yes | USA         | Healthy eating                                         | Social cognitive theory                                                     | No |
| Angelopoulos et al [216] | 2009 | Yes | Greece      | Healthy eating                                         | Theory of planned behaviour                                                 | No |
| Zepeda et al [217]       | 2008 | Yes | USA         | Healthy eating                                         | Precaution adoption process<br>model                                        | No |
| Resnicow et al [218]     | 2008 | No  | USA         | Fruits and/or vegetables                               | Self-determination theory                                                   | No |
| Park et al [219]         | 2008 | Yes | USA         | Fruits and/or vegetables                               | Transtheoretical model                                                      | No |

| Newman et al [220]           | 2008        | Yes                           | USA            | Healthy eating                                        | Social cognitive theory                                                                                          | No                   |
|------------------------------|-------------|-------------------------------|----------------|-------------------------------------------------------|------------------------------------------------------------------------------------------------------------------|----------------------|
| <b>Author (Ref number)</b>   | <b>Year</b> | <b>Dietitian/Nutritionist</b> | <b>Country</b> | <b>Dietary behaviour</b>                              | <b>Theory</b>                                                                                                    | <b>BCTs taxonomy</b> |
| Kroeze et al [221]           | 2008        | Yes                           | Netherlands    | Fat intake                                            | Precaution adoption process model                                                                                | No                   |
| Kelley et al [222]           | 2008        | Yes                           | USA            | Healthy eating                                        | Theory of planned behaviour                                                                                      | No                   |
| Ince et al [223]             | 2008        | No                            | Turkey         | Healthy eating                                        | Social cognitive theory                                                                                          | No                   |
| Greene et al [224]           | 2008        | Yes                           | USA            | Fruits and/or vegetables                              | Transtheoretical model                                                                                           | No                   |
| Di Noia et al [225]          | 2008        | Yes                           | USA            | Fruits and/or vegetables                              | Transtheoretical model                                                                                           | No                   |
| Canavera et al [226]         | 2008        | Yes                           | USA            | Fruits and/or vegetables<br>Sugar-sweetened beverages | Social cognitive theory                                                                                          | No                   |
| Burgess-Champoux et al [227] | 2008        | Yes                           | USA            | Whole grain foods                                     | Social cognitive theory                                                                                          | No                   |
| Bohaty et al [228]           | 2008        | No                            | USA            | Calcium intake<br>Vitamin D food sources              | Self-efficacy theory                                                                                             | No                   |
| Ahmed [229]                  | 2008        | No                            | Egypt          | Breastfeeding Knowledge                               | Social cognitive theory                                                                                          | No                   |
| Nitzke et al [230]           | 2007        | Yes                           | USA            | Fruits and/or vegetables                              | Transtheoretical model                                                                                           | No                   |
| Manios et al [231]           | 2007        | Yes                           | Greece         | Calcium intake<br>Vitamin D food sources              | Health belief model<br>Social cognitive theory                                                                   | No                   |
| Lautenschlager et al [232]   | 2007        | Yes                           | USA            | Healthy eating                                        | Theory of planned behaviour                                                                                      | No                   |
| Plotnikoff et al [233]       | 2005        | Yes                           | Canada         | Healthy eating                                        | Social cognitive theory<br>Transtheoretical Model<br>Protection motivation theory<br>Theory of Planned Behavior. | No                   |
| Gratton et al [234]          | 2007        | No                            | UK             | Fruits and/or vegetables                              | Theory of planned behaviour                                                                                      | No                   |
| Doerksen et al [235]         | 2007        | No                            | USA            | Fruits and/or vegetables                              | Social cognitive theory                                                                                          | No                   |
| Contento et al [236]         | 2007        | Yes                           | USA            | Healthy eating                                        | Theory of planned behaviour                                                                                      | No                   |
| Colby et al [237]            | 2007        | Yes                           | USA            | Healthy eating                                        | Social ecological model<br>Social cognitive theory                                                               | No                   |
| Armitage et al [238]         | 2007        | No                            | UK             | Fruits and/or vegetables                              | Theory of planned behaviour                                                                                      | No                   |
| Evans et al [239]            | 2006        | Yes                           | USA            | Healthy eating                                        | Social cognitive theory                                                                                          | No                   |
| Tussing et al [240]          | 2005        | Yes                           | USA            | Calcium intake                                        | Health belief model<br>Theory of reasoned action                                                                 | No                   |
| Tsorbatzoudis et al [241]    | 2005        | No                            | Greece         | Healthy eating                                        | Theory of planned behaviour                                                                                      | No                   |
| Schrader et al [242]         | 2005        | No                            | USA            | Calcium intake                                        | Health belief model                                                                                              | No                   |
| Powers et al [243]           | 2005        | Yes                           | USA            | Healthy eating                                        | Social cognitive theory                                                                                          | No                   |
| Frenn et al [244]            | 2005        | No                            | USA            | Fat intake                                            | Transtheoretical model                                                                                           | No                   |

| Cullen et al [245] Baranowski [264] | 2005 | Yes                    | USA     | Fruits and/or vegetables               | Social cognitive theory                                                    | No            |
|-------------------------------------|------|------------------------|---------|----------------------------------------|----------------------------------------------------------------------------|---------------|
| Anderson et al [246]                | 2005 | Yes                    | UK      | Fruits and/or vegetables               | Theory of planned behaviour                                                | No            |
| Rinderknecht et al [247]            | 2004 | Yes                    | USA     | Healthy eating                         | Social cognitive theory                                                    | No            |
| Author (Ref number)                 | Year | Dietitian/Nutritionist | Country | Dietary behaviour                      | Theory                                                                     | BCTs taxonomy |
| Lytle et al [248]                   | 2004 | Yes                    | USA     | Fibre intake<br>Fat intake             | Social cognitive theory                                                    | No            |
| Levy et al [249]                    | 2004 | Yes                    | USA     | Cooking skills for Healthy eating      | Social learning theory                                                     | No            |
| Helinski et al [250]                | 2004 | Yes                    | USA     | Folic-acid intake                      | Health belief model                                                        | No            |
| Carpenter et al [251]               | 2004 | Yes                    | USA     | Healthy eating                         | Social cognitive theory<br>Transtheoretical model                          | No            |
| Campbell et al [252]                | 2004 | Yes                    | USA     | Fruits and/or vegetables<br>Fat intake | Social cognitive theory<br>Transtheoretical model<br>Health belief model   | No            |
| Campbell et al [253]                | 2004 | Yes                    | USA     | Healthy eating                         | Social cognitive theory<br>Transtheoretical model                          | No            |
| Abood et al [254]                   | 2004 | No                     | USA     | Healthy eating                         | Social cognitive theory                                                    | No            |
| Veverka et al [255]                 | 2003 | Yes                    | USA     | Healthy eating                         | Transtheoretical model                                                     | No            |
| Van Horn et al [256]                | 2003 | Yes                    | USA     | Fat intake                             | Social cognitive theory<br>Social Action Theory                            | No            |
| Step toe et al [257]                | 2003 | No                     | UK      | Fruits and/or vegetables               | Social learning theory<br>and Stage of Change ie<br>Transtheoretical model | No            |
| Holmes et al [258]                  | 2003 | Yes                    | USA     | Folic-acid enriched foods              | Social cognitive theory                                                    | No            |
| Gribble et al [259]                 | 2003 | Yes                    | USA     | Fruits and/or vegetables               | Social learning theory                                                     | No            |
| Gaughan et al [260]                 | 2003 | Yes                    | USA     | Healthy eating                         | Social cognitive theory                                                    | No            |
| Frenn et al [261]                   | 2003 | No                     | USA     | Fat intake                             | Transtheoretical model<br>Health promotion model                           | No            |
| Derrickson et al [262]              | 2003 | Yes                    | USA     | Healthy eating                         | Social learning theory<br>Self-efficacy theory                             | No            |
| Davis et al [263]                   | 2003 | Yes                    | USA     | Healthy eating                         | Social learning theory                                                     | No            |
| Abood et al [265]                   | 2003 | Yes                    | USA     | Healthy eating                         | Health belief model                                                        | No            |
| Wilson et al [266]                  | 2002 | No                     | USA     | Fruits and/or vegetables               | Social cognitive theory                                                    | No            |
| Morris et al [267]                  | 2002 | Yes                    | USA     | Fruits and/or vegetables               | Social cognitive theory                                                    | No            |
| Evans et al [268]                   | 2002 | Yes                    | USA     | Healthy eating                         | Social cognitive theory                                                    | No            |

|                         |      |     |             |                          |                         |    |
|-------------------------|------|-----|-------------|--------------------------|-------------------------|----|
| Schnoll et al [269]     | 2001 | Yes | USA         | Fibre intake             | Social cognitive theory | No |
| Anderson et al [270]    | 2001 | No  | USA         | Healthy eating           | Social cognitive theory | No |
| Siero et al [271]       | 2000 | No  | Netherlands | Mediterranean Diet       | Transtheoretical model  | No |
| Macpherson et al [272]  | 2000 | Yes | USA         | Healthy eating           | Social learning theory  | No |
| Havas et al [273]       | 2000 | Yes | USA         | Fruits and/or vegetables | Transtheoretical model  | No |
| Gray-Donald et al [274] | 2000 | Yes | Canada      | Healthy eating           | Social learning theory  | No |
| Finckenor et al [275]   | 2000 | Yes | USA         | Fat intake               | Transtheoretical model  | No |
| Baranowski et al [276]  | 2000 | Yes | USA         | Fruits and/or vegetables | Social cognitive theory | No |
